# Supplementary material
Source: PubMed Central journal article supplement (PMC5937523)
Supplement: NIHMS962154-supplement-Supporting_information.pdf [file NIHMS962154-supplement-Supporting_information.pdf]

## **Supporting Information**

Lysine deacetylases exhibit distinct changes in activity profiles due to fluorophore-conjugation of substrates

Tasha B. Toro, Jenae R. Bryant, and Terry J. Watt\*

Department of Chemistry, Xavier University of Louisiana, New Orleans, Louisiana 70125-1098, United States

\* E-mail: [tjwatt@xula.edu](mailto:tjwatt@xula.edu)

**Table S1. NMR peaks for {K-ac} in d<sub>6</sub>-DMSO.**

| Proton(s)                                     | $\delta$ (ppm) |
|-----------------------------------------------|----------------|
| N $\alpha$ (NH)                               | 7.35 (s, 1H)   |
| N $\alpha$ acetyl methyl (CH <sub>3</sub> )   | 1.84 (s, 3H)   |
| C $\alpha$ (CH)                               | 4.13 (m, 1H)   |
| C $\alpha$ amide (NH <sub>2</sub> )           | 7.86 (d, 2H)   |
| C $\beta$ (CH <sub>2</sub> )                  | 1.68 (m, 2H)   |
| C $\gamma$ (CH <sub>2</sub> )                 | 1.30 (m, 2H)   |
| C $\delta$ (CH <sub>2</sub> )                 | 1.55 (m, 2H)   |
| C $\epsilon$ (CH <sub>2</sub> )               | 2.98 (q, 2H)   |
| N $\epsilon$ (NH)                             | 6.94 (s, 1H)   |
| N $\epsilon$ acetyl methyl (CH <sub>3</sub> ) | 1.78 (s, 3H)   |

**Table S2. Endpoint specific activity ( $\times 10^{-3} \text{ s}^{-1}$ ) for KDACs with 100  $\mu\text{M}$  peptide substrates**

| Substrate          | KDAC8         | KDAC6         | KDAC4HY        | Sirt1          |
|--------------------|---------------|---------------|----------------|----------------|
| {K-ac}             | < 0.1         | 1.1 $\pm$ 0.2 | 1.1 $\pm$ 0.9  | 1.0 $\pm$ 2.0  |
| {K-ac}W            | 1.5 $\pm$ 0.9 | 70 $\pm$ 30   | 1.8 $\pm$ 0.2  | 14 $\pm$ 10    |
| {K-ac}-AMC         | 1.8 $\pm$ 0.5 | 190 $\pm$ 30  | 510 $\pm$ 60   | 0.6 $\pm$ 0.1  |
| RG{K-ac}           | < 0.1         | 22 $\pm$ 11   | 2.2 $\pm$ 1.4  | 3.5 $\pm$ 1.0  |
| RG{K-ac}W          | 1.4 $\pm$ 1.1 | 100 $\pm$ 30  | 3.4 $\pm$ 0.7  | 30.5 $\pm$ 1.3 |
| RG{K-ac}-AMC       | 3.8 $\pm$ 1.7 | 190 $\pm$ 50  | 460 $\pm$ 60   | 1.0 $\pm$ 0.3  |
| RH{K-ac}{K-ac}     | 4.3 $\pm$ 1.8 | 25 $\pm$ 9    | 16 $\pm$ 4     | 27.6 $\pm$ 1.6 |
| RH{K-ac}{K-ac}W    | 9.2 $\pm$ 1.4 | 90 $\pm$ 40   | 26.4 $\pm$ 1.6 | 57.3 $\pm$ 0.9 |
| RH{K-ac}{K-ac}-AMC | 24 $\pm$ 4    | 230 $\pm$ 40  | 430 $\pm$ 90   | 1.0 $\pm$ 0.1  |

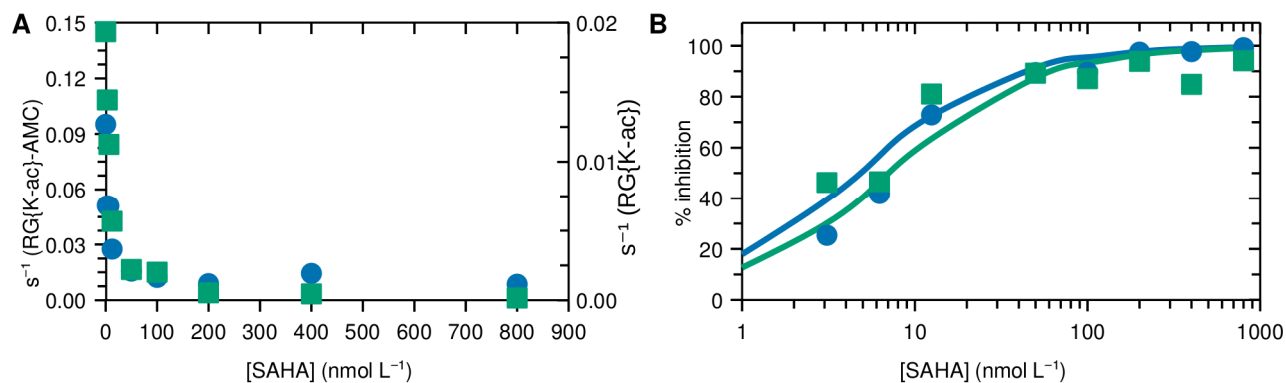

**Figure S1. SAHA titrations of KDAC6.** Endpoint assays of KDAC6 with RG{K-ac} (blue circles) or RG{K-ac}-AMC (green squares) in the presence of variable amounts of SAHA, performed as described in the methods where reactions were supplemented by 0-800 nmol L<sup>-1</sup> SAHA. (A) Specific activity. Note the use of two vertical axis scales. (B) Data plotted as percent inhibition, where lines represent best-fit to the data. Calculated IC<sub>50</sub> values are 4.7 ± 0.9 nmol L<sup>-1</sup> and 7.2 ± 0.7 nmol L<sup>-1</sup>, respectively.
